# Supplementary material for: Modeling the syn-cycle in the light activated opening of the channelrhodopsin-2 ion channel
Source: Royal Society of Chemistry journal article supplement (doi:10.1039/d1ra08521b), 2022-01-01
Supplement: d1ra08521b1.pdf [file d1ra08521b1.pdf]

## Supporting Information

In this research, five independent trajectories were simulated for P480 and P500\* states and the RMSDs cannot be identical due to different initial speeds. The RMSD curves (Figure S1) display that both P480 and P500\* states reach equilibrium at the last 50 ns (except No. 1 trajectory of P500\*, as seen in Figure S1b). As for the distances in Figure S2, we calculated the average value of distances of  $\text{RSBH}^+$ -D253 and  $\text{RSBH}^+$ -E123 respectively for the No.2 ~No.4 trajectories, and selected the No. 4 trajectory to analyze.

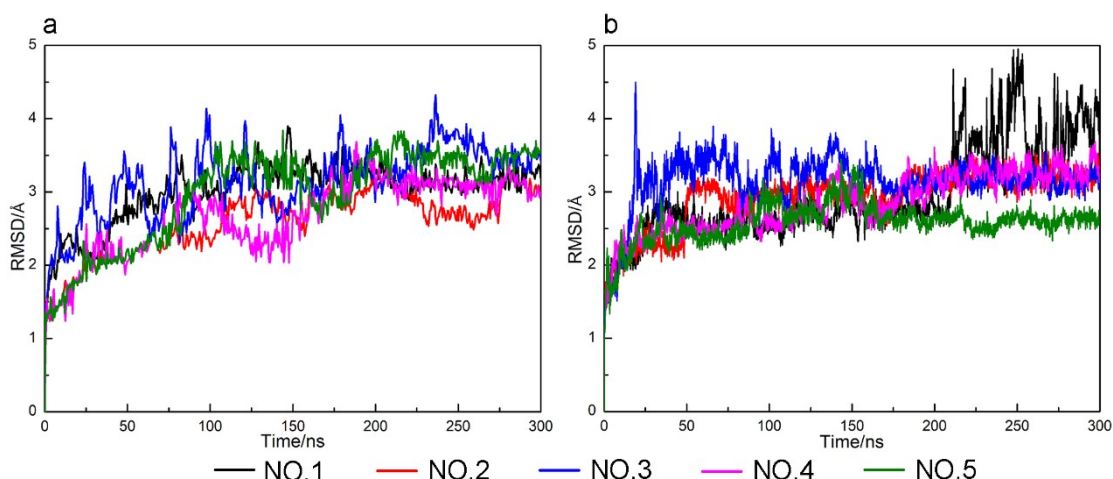

Figure S1. RMSDs of five independent trajectories for (a) P480 state and (b) P500\* state.

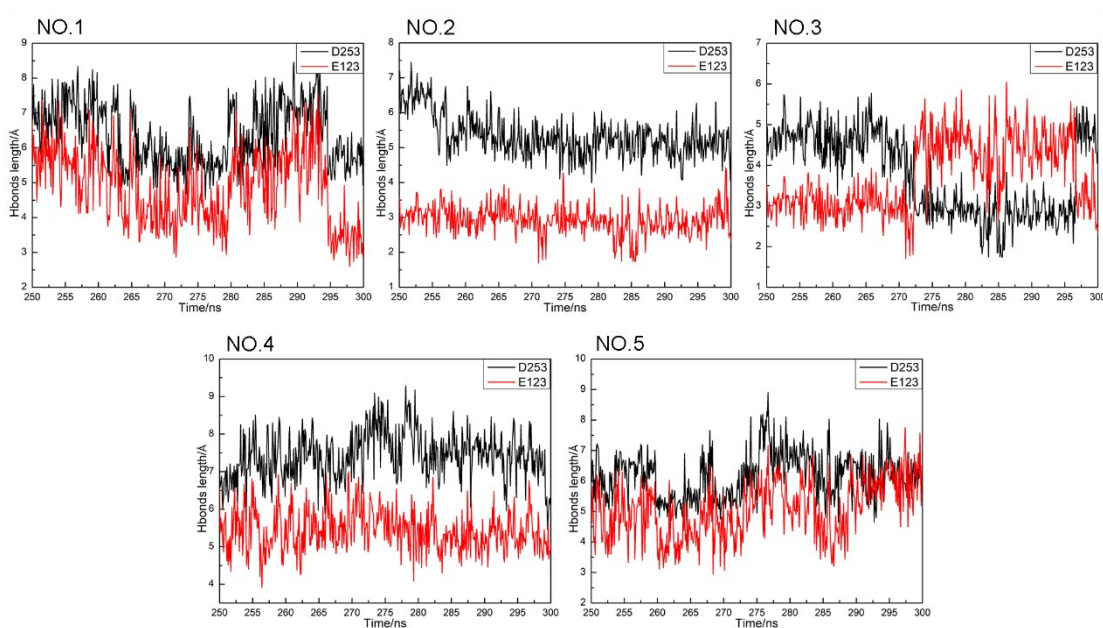

Figure S2. The distances between  $\text{RSBH}^+$  and counter residues (E123 and D253) of P500\* state in the last 50ns for each trajectory.

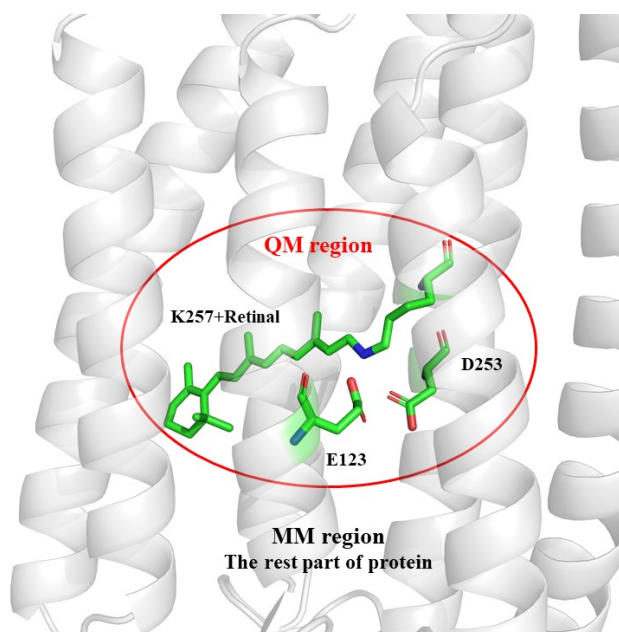

Figure S3 Scheme of QM and MM regions.

Table S1. The probability of RSBH<sup>+</sup> forming hydrogen bonds with E123 and D253 in each simulation.

|      | NO.1 | NO.2 | NO.3 | NO.4 | NO.5 |
|------|------|------|------|------|------|
| D253 | 0    | 0    | 0    | 0    | 0    |
| E123 | 6.4% | 4.8% | 6%   | 0    | 0.8% |
